# Supplementary material for: Exocyst subunit SEC3A marks the germination site and is essential for pollen germination in Arabidopsis thaliana
Source: PubMed Central journal article supplement (PMC5225640; doi:10.1038/srep40279), 2017-01-11
Supplement: srep40279-s1.pdf [file srep40279-s1.pdf]

**Exocyst subunit SEC3A marks the germination site and is essential for pollen germination in *Arabidopsis thaliana***

Yan Li, Xiaoyun Tan, Mengru Wang, Bingxuan Li, Yanxue Zhao, Chengyun Wu, Qingchen Rui, Junxia Wang, Zhongyuan Liu and Yiqun Bao<sup>1</sup>

College of Life Sciences, Nanjing Agricultural University, Nanjing 210095, People's Republic of China

<sup>1</sup>To whom correspondence should be addressed: E-mail: [baoyiqun@njau.edu.cn](mailto:baoyiqun@njau.edu.cn)

Fax: +86-25-84396795

**Supplementary Video. S1 online: SEC3A proteins marks the pollen germination site during pollen germination. Bars= 15  $\mu$ m.**

**Supplementary Video. S2 online: The localization of SEC3A in the growing pollen tube. Bars= 20  $\mu$ m.**

**Supplementary Video. S3 online: The localization of SEC3A during pollen tube growth. Bars= 20  $\mu$ m.**

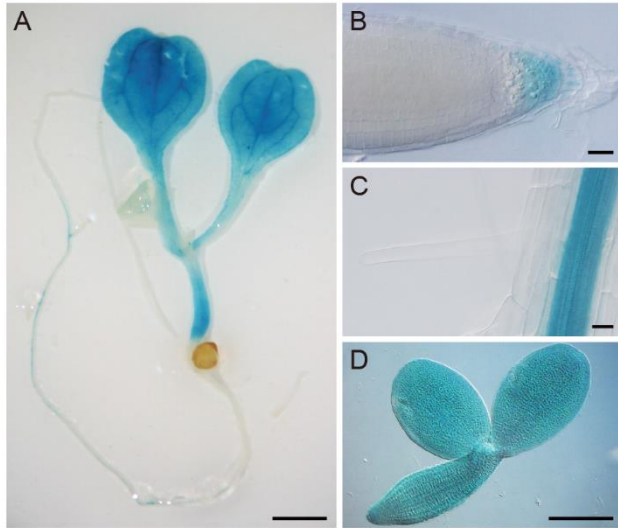

**Supplementary Figure S1 online:** Expression of *SEC3A* was detected in the seedling (A), the root columella cells (B), the vascular bundles of root maturation zone (C), and the embryo (D). Bars= 1 mm for (A), 20  $\mu\text{m}$  for (B, C), and 200  $\mu\text{m}$  for (D).

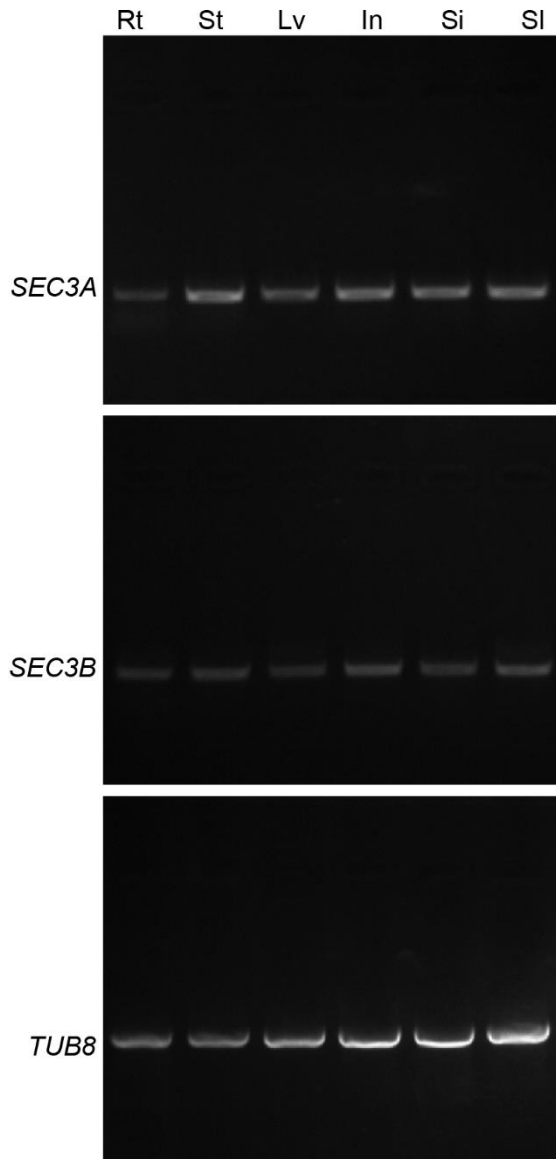

**Supplementary Figure S2 online: RT-PCR analysis of *SEC3A* and *SEC3B* gene expression.** Rt, root; St, stem; Lv, mature leaves; In, inflorescence; Si, siliques; Sl, seedlings. *TUB8* was used as an internal loading control.

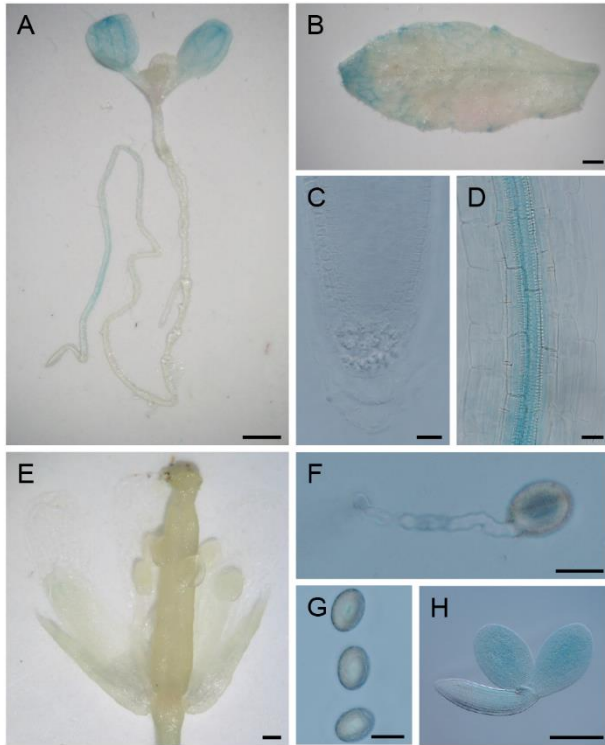

**Supplementary Figure S3 online: Expression pattern of *SEC3B* in Arabidopsis. (A)**

Seedlings, (B) mature leaves, (C) root tip, (D) root vasculature, (E) flower, (F) pollen tube, (G) pollen grain and (H) embryo. Bars= 1 mm for (A, B), 20  $\mu\text{m}$  for (C, D, F, G) and 200  $\mu\text{m}$  for (E, H).

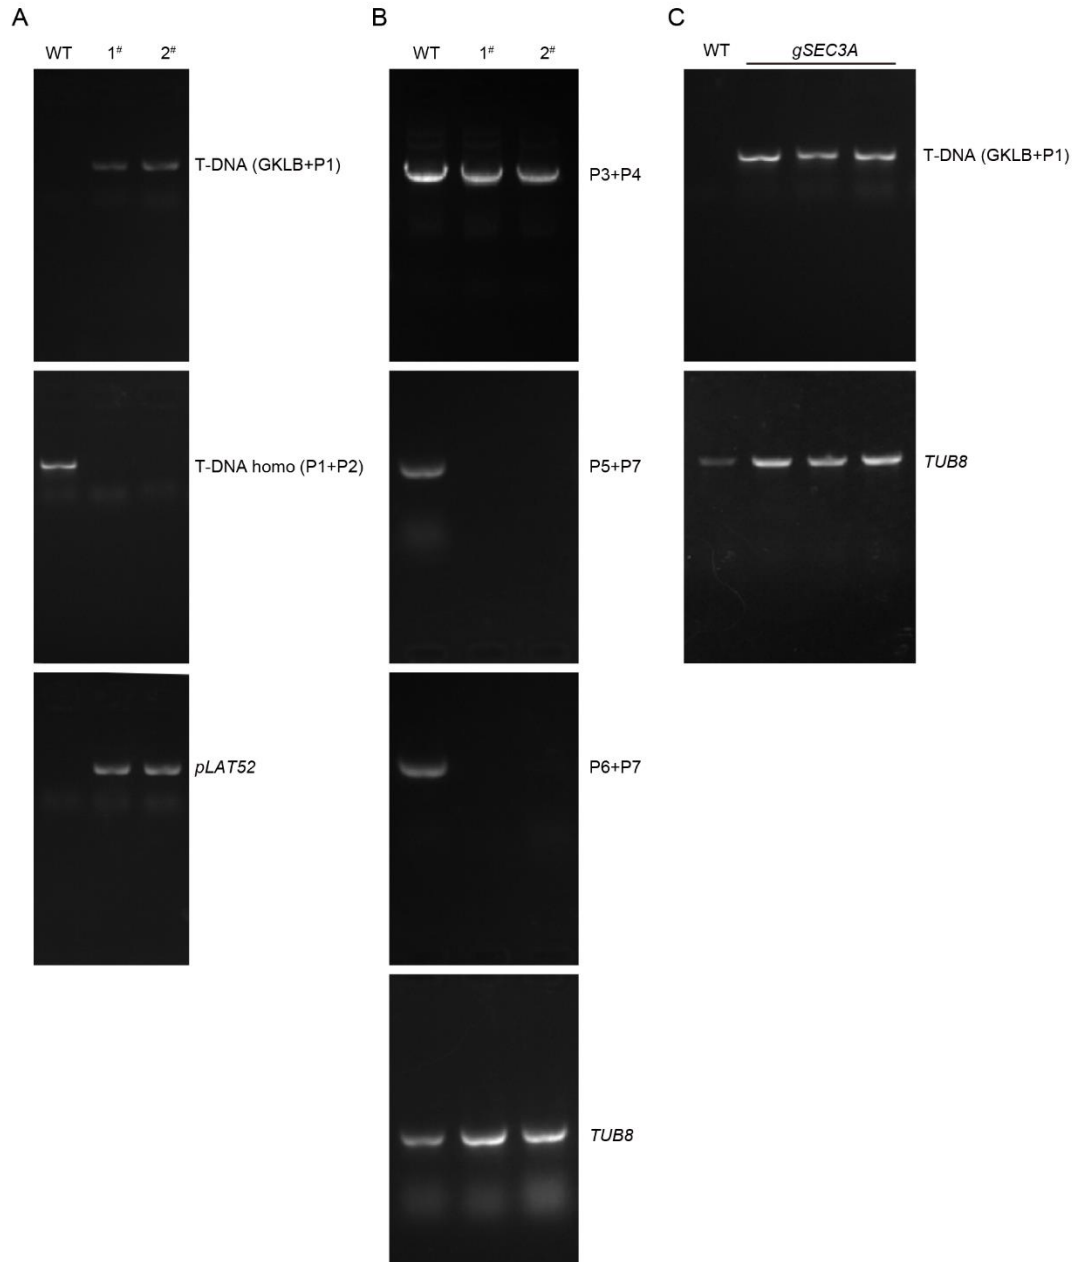

**Supplementary Figure S4 online: Complementation analysis of *sec3a* mutants with *pLAT52:SEC3A-GFP* or *gSEC3A* transgene. (A) Genotyping of *PRsec3a-GFP* 1<sup>#</sup> and 2<sup>#</sup> lines by PCR analysis. (B) The expression of different *SEC3a* transcripts in *PRsec3a-GFP* 1<sup>#</sup> and 2<sup>#</sup> lines. (C) Genotyping of *sec3a/SEC3A* mutant plant bearing *gSEC3A* hemizygous transgene. *TUB8* was used as an internal control.**



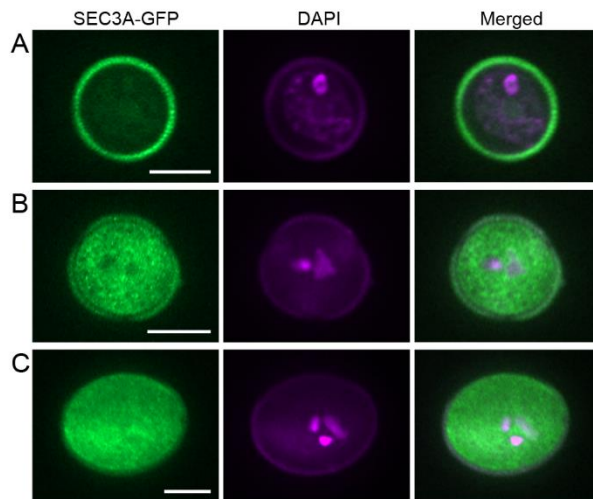

**Supplementary Figure S5 online: SEC3A proteins expressed from the bicellular stage onwards.** (A-C) Confocal images of SEC3A (green) and DAPI (magenta) signals in pollen at stages of Microspore (A), Bicellular (B), and Tricellular (C). Bars= 10  $\mu\text{m}$ .

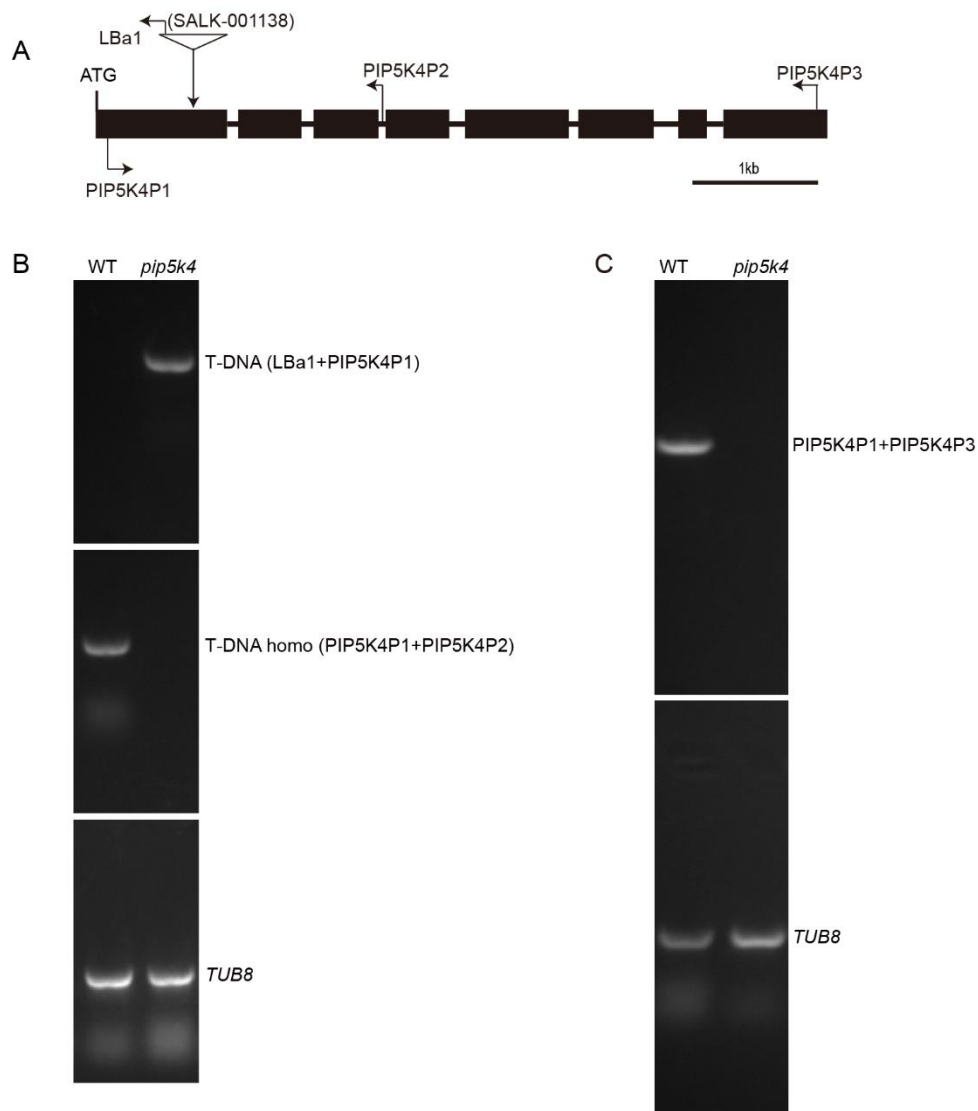

**Supplementary Figure S6 online: Genotyping of *pip5k4* mutant (SALK\_001138).**

(A) Graphical representation of the position of insertion. (B) Genotyping results showed that this mutant is a homozygote. (C) RT-PCR analysis showed the absence of *PIP5K4* transcripts in homozygous *pip5k4* line. *TUB8* was used as an internal control.

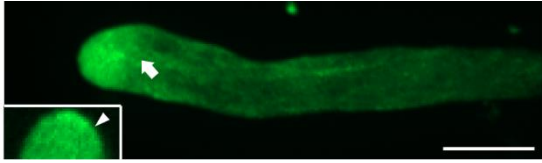

**Supplementary Figure S7 online: The localization of SEC3A in pollen tube.**

Arrows and arrowhead indicated the prime localization of SEC3A. Bars=10  $\mu$ m.

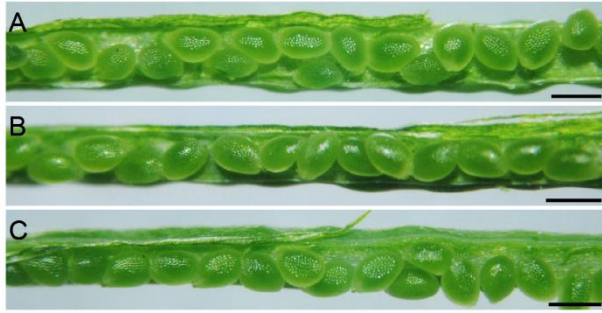

**Supplementary Figure S8 online: The *PRsec3a* embryos are normal.** Wild type (A), *PRsec3a* 1<sup>#</sup> (B) and *PRsec3a* 2<sup>#</sup> (C) developing seeds within the siliques. Bars= 0.5 mm.

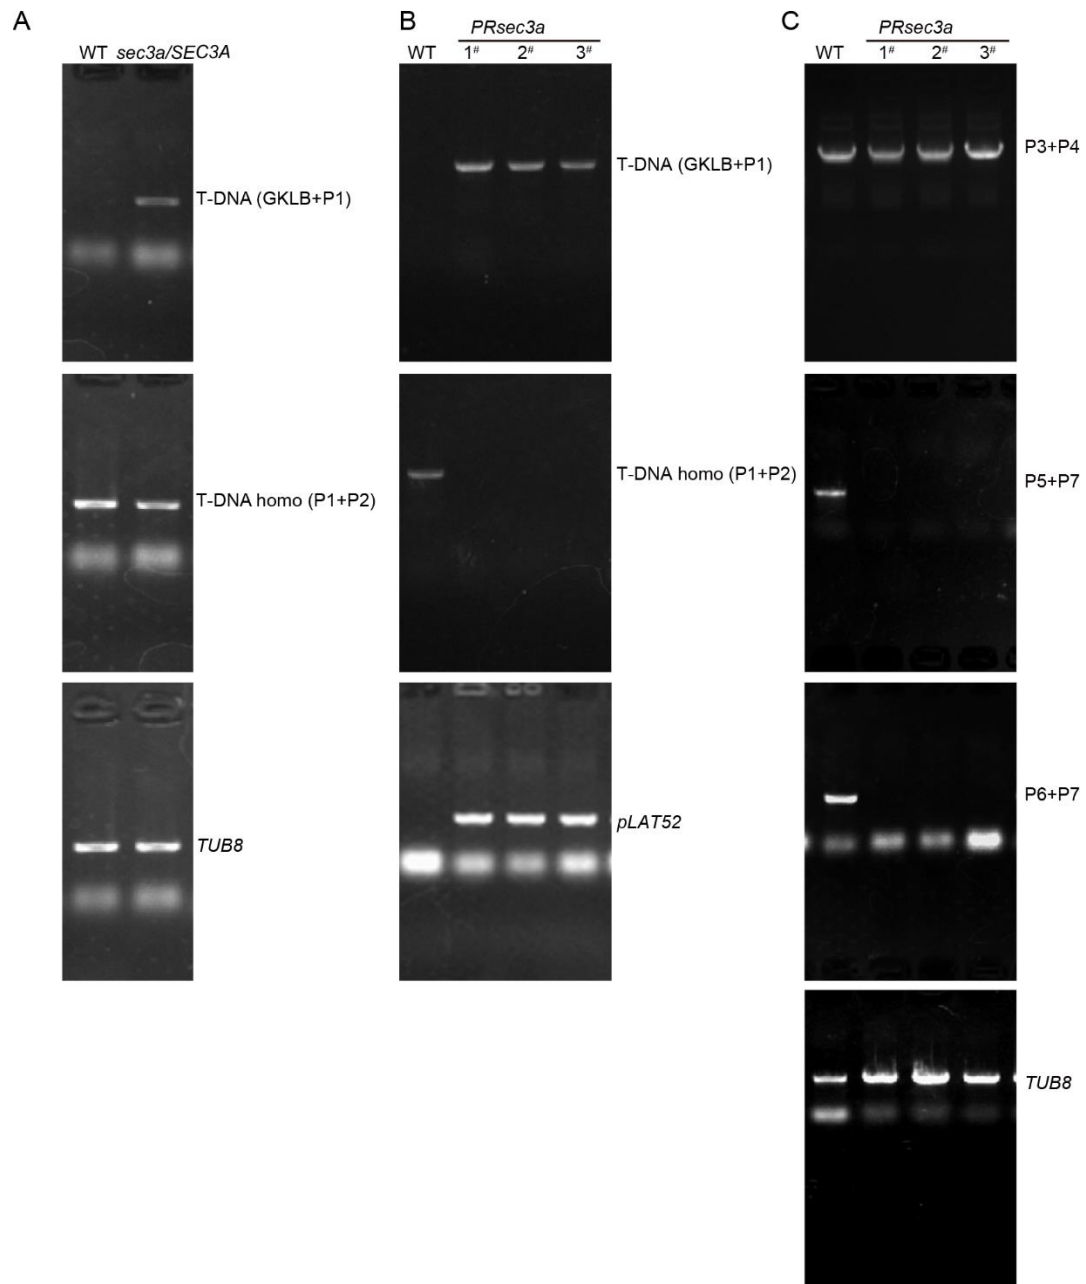

**Supplementary Figure S9 online:** (A) Full-length gel of Figure 1H. (B) Full-length gel of Figure 3A. (C) Full-length gel of Figure 3B.

| Usage                                                                      | Primer Name         | Oligo nucleotide (5'-3')                     |
|----------------------------------------------------------------------------|---------------------|----------------------------------------------|
| <b>Genotyping<br/>and<br/>transgenic<br/>plant<br/>identification</b>      | GK-LB               | ATATTGACCATCATACTCATTGC                      |
|                                                                            | LBa1                | TGGTTCACGTAGTGGGCCATCG                       |
|                                                                            | P1                  | CTCCCAATTGTTCATACTTCC                        |
|                                                                            | P2                  | CTCCAGGAACGTTTTCACTC                         |
|                                                                            | P3                  | ATGGCGAAATCAAGCGCCGA                         |
|                                                                            | P4                  | GTAGCAACTCCTCTGATGCTAG                       |
|                                                                            | P5                  | GTGGACAAATCGATTGCAGCA                        |
|                                                                            | P6                  | ACGAGAGCTTCGTGCAGCTC                         |
|                                                                            | P7                  | CGACTCTGCTAAGAGAGCCA                         |
|                                                                            | P8                  | TTTCGTGGACCCTTTGATTT                         |
|                                                                            | PIP5K4P1            | TGAACGGTACTTATTATCCATCAGG                    |
|                                                                            | PIP5K4P2            | AAGCACCTGCATTATATAATTCCAG                    |
|                                                                            | PIP5K4P3            | ACGTCTCGAGTACAGCCTCG                         |
|                                                                            | LAT52P1             | GCATGCCTGCAGGTCGAC                           |
|                                                                            | LAT52P2             | GATCCTCTAGACTCCATGG'                         |
|                                                                            | TUB8-S              | CTTCGTATTTGGTCAATCCGGTGC                     |
|                                                                            | TUB8-A              | GAACATGGCTGAGGCTGTCAAGTA                     |
|                                                                            | SEC3A RT-S          | ATGGCCAGTTTCCTCAGTG                          |
|                                                                            | SEC3A RT-A          | AGCCATCCAAATCGAGAGC                          |
|                                                                            | SEC3B RT-S          | GTGATTGAACCAAACTGAAGGC                       |
| SEC3B RT-A                                                                 | ACATCACTTGTATCCGTGA |                                              |
| <b>Gene<br/>expression<br/>and protein<br/>localization<br/>constructs</b> | PSEC3A:GUS-S        | ggaattcGGCCAACCTTCTTTGTCTCTGTCTTT            |
|                                                                            | PSEC3A:GUS-A        | aactgcagTGTTGTTGTTGCGGATCCAGC                |
|                                                                            | PSEC3B:GUS-S        | ggaattcGAAGACGAGAGTTCAGATTGGTCCG             |
|                                                                            | PSEC3B:GUS-A        | aactgcagTGTTGTTGTTGCGGATCCAGC                |
|                                                                            | pLAT52 -S           | cgagctcATACTCGACTCAGAAGGTATTG                |
|                                                                            | pLAT52 -A           | ggggtaccTAATTGGAAATTTTTTTTTTTGG              |
|                                                                            | SEC3A1-S            | cgggatccATGGCGAAATCAAGCGCCGA                 |
|                                                                            | SEC3A1-A            | ctagctagcCATGGAAGCCAGAAGTCCTCTC              |
|                                                                            | SEC3A2-S            | agcttgcagcctgcagGGCCAACCTTCTTTGTCTCTGTC      |
|                                                                            | SEC3A2-A            | cggggaattcgcagctcGAGTGGTCTTCTGCCTACATAA<br>G |

**Supplementary Table S1 online:** List of primer pairs used in this study.

| Complemented T <sub>1</sub>  | No. of Progeny | With insertion | Without insertion | Ratio |
|------------------------------|----------------|----------------|-------------------|-------|
| <i>gSEC3A</i> 1 <sup>#</sup> | 207            | 132            | 75                | 1.76  |
| <i>gSEC3A</i> 2 <sup>#</sup> | 235            | 145            | 90                | 1.61  |

*gSEC3A* represents *pSEC3A:gSEC3A* hemizygous transgenic line in *sec3a/SEC3A* background.

Ratio = With insertion/Without T-DNA insertion.

**Supplementary Table S2 online:** Complementation analysis of *sec3a/SEC3A* mutants.
